# Supplementary material for: Cytosine-Rich Oligonucleotide and Electrochemically Reduced Graphene Oxide Nanocomposite for Ultrasensitive Electrochemical Ag+ Sensing
Source: MDPI journal article supplement (doi:10.3390/nano14090775), 2024-04-29
Supplement: s1 [file s1]

**Supplementary Materials**

**for**

**Cytosine-Rich Oligonucleotide and Electrochemically Reduced Graphene Oxide Nanocomposite  
for Ultrasensitive Electro-chemical Ag<sup>+</sup> Sensing**

Nasir Abbas<sup>†</sup>, Seung Joo Jang<sup>†</sup> and Tae Hyun Kim<sup>\*</sup>

Department of Chemistry, Soonchunhyang University, Asan 31538, Republic of Korea

**\*Corresponding Author:** Tae Hyun Kim (E-mail: [thkim@sch.ac.kr](mailto:thkim@sch.ac.kr)).

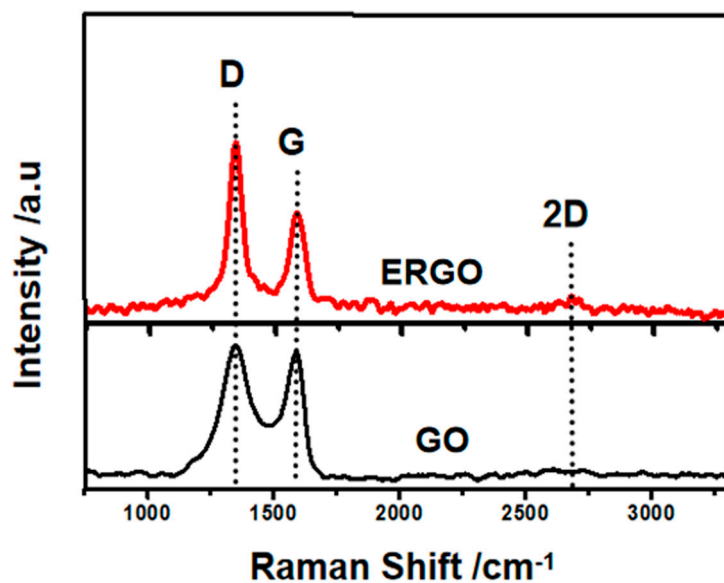

**Figure S1.** Raman spectra of GO and ERGO

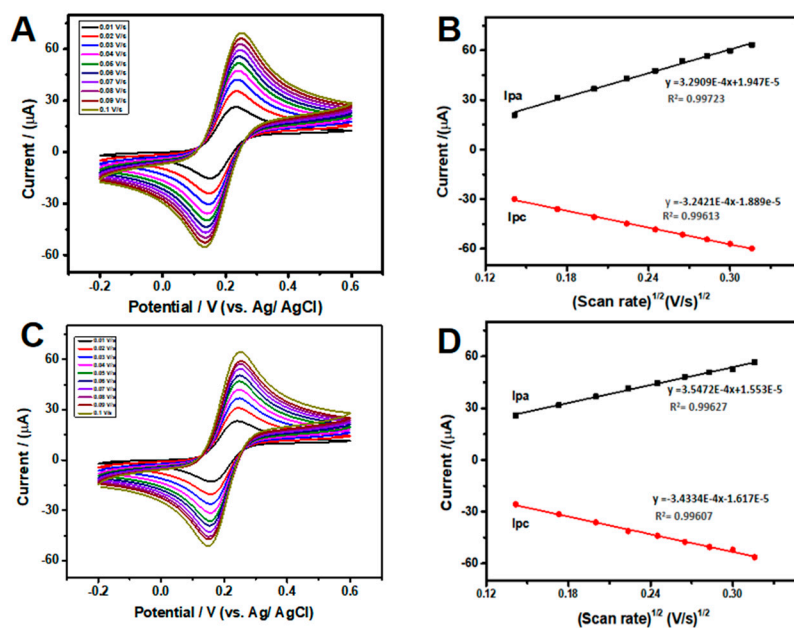

**Figure S2.** CV curves at various scan rates from 0.01 to 0.1 V/s at (A) bare GCE and (C) ERGO-GCE. (B) Linear plots of  $v^{1/2}$  vs. redox peak currents ( $I_{pa}/I_{pc}$ ) at (B) bare GCE and (D) ERGO-GCE in 5 mM  $[\text{Fe}(\text{CN})_6]^{3-}$  in 0.1M KCl solution.
